# Supplementary material
Source: publisher site journal article supplement (https://www.dovepress.com/article/534595)
Supplement: Supplementary file 1 [file Supplementary%20material_1.docx]

**Supplementary material**

Table S1. The nursing intervention program based on a multi-theoretical model.

| MTM  structure | Intervention theme | Intervention content | Time | Duration of intervention | sites |
| --- | --- | --- | --- | --- | --- |
| Participatory dialogue | First Acquaintance - Paying Attention to Psychology | ①Meeting for the first time: Self-introduction to the study population, answering questions related to the patient's new admission, helping the patient to solve current problems, and increasing trust.  ②Face to face meeting: To understand the patient's knowledge about breast cancer, open-ended questions were asked: “What are the biggest problems caused by the disease?” “How do you overcome these problems?”, etc. The patients were guided to talk about their psychological feelings and confusion after the disease, and to express their inner and real feelings. Patients' fear levels were measured using the Fear of Disease Progression Scale. The patients were also told that it is normal for them to have fear and worry for the first time, explained the impact of excessive fear on the recovery of the treatment, and encouraged each other to cope with the disease positively.  ③Discussion of pros and cons: Discuss with the patient the benefits and barriers to managing FoP. Conclude with the researcher emphasizing the dangers of FoP and the importance of adhering to healthy behaviors. Problems and barriers are analyzed with the patient and strategies to overcome barriers are summarized.  ④Establish contact：Leave WeChat or phone numbers with each other and the study participants to facilitate communication, answer questions in a timely manner, and introduce the form and content of the next event.  *Homework: Express Your Heart - Write about your knowledge of breast cancer and current concerns.* | Weeks  1-2 | 30min | Face to face |
| Behavioral confidence | Transferring Knowledge - Enhancing Behavior | ①Knowledge training: Breast surgery experts were invited to popularize breast cancer-related knowledge for the study participants, explaining the causes of breast cancer, clinical manifestations, treatment methods, side effects of chemotherapy drugs, how to quickly identify recurrence and common misunderstandings, and the importance of behavioral changes in preventing recurrence, so as to promote the study participants to establish a correct cognition. Distribute the health education brochure developed by research group itself at the end of the program.  ②Fun quiz: To understand the knowledge mastery, invite patients to answer questions, active participation and correct answers to give a small prize reward.  ③Thematic counseling: After the lecture, the researcher will carry out the thematic activity of accepting oneself and rebuilding hope. A short inspirational movie on fighting cancer was played to guide patients to explore positive emotions and accept themselves. Patients were instructed to adhere to healthy behaviors, rebuild their confidence in life and improve their quality of life.  ④Stress reduction exercises: Patients are explained the method, intensity, and frequency of progressive muscle relaxation exercises. The researcher conducts a demonstration to break down complex behaviors into simple steps to gradually change health behaviors starting with setting small goals.  *Homework: Progressive muscle relaxation training according to the health education manual: 15min/day, gradually increasing by 25min/day.* | Weeks  1-2 | 30min | Face-to-face/WeChat |
| Changes in the physical environment | Reinforcing Knowledge - Building Beliefs | ①Mutual aid groups: Mutual aid groups are set up in the form of WeChat groups, where patients can discuss with each other, interact and learn from each other, creating a good learning environment for patients.  ②Health-related knowledge and video instruction on stress reduction exercises were pushed through the pre-established WeChat public number.  ③Provide online counseling: Q&A is provided every Monday and Friday afternoon to help patients resolve difficulties encountered in the process of behavioral change and enhance their confidence in coping with behavioral change.  If the patient's negative emotions such as resistance or suspension occur during the intervention process, the reasons for the suspension of their behavior should be analyzed in a timely manner. Agree on countermeasures with the psychological counseling experts and guide the patient to self-regulation. | Week 3 | 10-20min | WeChat Platform |
| Emotional transformation | Relaxation - Rebuilding Hope | ①Listening to fears: Ask the patient to talk about the problems that make her fearful, and analyze the internal reasons for the fear of disease progression. Encourage the patient to accept the fact of the disease from a positive point of view, set the mindset correctly, and guide the family to provide help and support. Encourage the patient to face the progression of the disease and face the fear.  ②Experience sharing: Encourage discussion among caregivers and invite patients and caregivers who have recovered well to share their optimism, behaviors and perceptions in the face of illness. Encourage mutual communication to enhance a sense of identity and motivate everyone to face illness and fear.  ③Power of role models: Encourage card punching in WeChat groups, display photos of patients adhering to healthy behaviors, and distribute small prizes based on card punching records.  ④Providing information on socio-economic assistance: Explaining the government's health care system to the study participants, inquiring about local applications for major disease subsidies, and other ways to alleviate patients' financial pressure.  *Homework: Have the patient write down how they felt during their hospitalization and their current knowledge of their fears of disease progression, and keep a daily record of their emotions after discharge.* | Week 4 | 30-40min | Face to face |
| Practice for change | Positive Coping - Making Plans | ①Downward comparison: Introducing study participants to the benefits of downward comparison and encouraging themselves to actively embrace the trauma of their illness by comparing themselves to others. See things in a positive light.  ②Clarify own values: Make patients understand the importance of appreciating the present moment and doing things of value. Think about “What is most important to you in your inner being? What do you want to do most after recovery?” This will inspire the patient's confidence in his/her recovery.  ③Formulation of plans: The study participants were instructed to set short-term and long-term small goals, which could be in terms of disease recovery, personal life or work. Encourage the patients and their spouses to accomplish them together and support each other to help them return to normal life as soon as possible.  *Homework: perform rehabilitation exercises and relaxation exercises on time.* | Week 5 | 30-40min | WeChat Platform |
| Changes in the social environment | Social Support - Joint Supervision | ①Family support: Tapping into the positive resources around the patient, encouraging family and friends to work together to overcome difficulties, and gaining understanding and help from family and friends.  ②Medical and nursing support: Regular follow-up visits to understand the patient's psychological condition and provide health guidance.  ③Summarization: The researcher summarizes and follows up with questions in a timely manner through the WeChat group. | Week 6 | 15-20min | WeChat Platform |

**Expert correspondence**

1. Inclusion Criteria for Experts

① working time ≥ 10 years, with rich clinical experience; ② intermediate or above title; ③ undergraduate degree or above; ④ proficient in breast cancer diagnosis and treatment and nursing care and other knowledge; ⑤ informed consent and voluntary participation.

2. Contents of the letter

(1) Guidelines: explain to the experts the background, purpose and significance of the study, as well as the way to fill in the questionnaire and the feedback time;

(2) Experts' general information questionnaire: including experts' age, gender, highest education, title, position, years of working experience, work unit and nature, and whether they have working experience or experience in breast surgery, oncology and psychology.

(3) Expert authority self-assessment form: the expert's familiarity was categorized as very familiar, more familiar, generally familiar, less familiar, and unfamiliar.

(4) Expert Consultation Questionnaire: The importance and feasibility of each entry was assessed according to the Likert scale, using the words “not important, not too important, generally important, relatively important, and very important.

3. Correspondence method

Expert consultation questionnaires were distributed by Email or WeChat, with an interval of 2 weeks between each round of consultation. Based on the feedback from the first round of consultation, the research team consults to create a new questionnaire and conducts the next round of consultation. When the experts' opinions are basically the same, the consultation will be stopped.

4. Quality control

(1) The nursing intervention program was developed strictly based on the multi-theoretical model and the results of our previous cross-sectional study.

(2) In order to ensure the completeness and credibility of the information, the uncertain information in the expert recommendations was reviewed and verified one by one during the questionnaire revision process.

5. Expert authority factor and degree of harmonization of expert opinions.

The expert authority coefficient determines the value of expert advice based on the use of the expert judgment score (Ca) and expert familiarity score (Cs), calculated as Cr = (Ca + Cs)/2. The expert authority coefficient (Cr) reflects the expert's theoretical knowledge and practical experience of the indicator, and is generally Cr ≥ 0.7. The coefficient of variation (CV) and Kendall's coefficient of coordination (W) are the main indicators for evaluating the degree of expert opinion and coordination. The coefficient of variation (CV) indicates the degree of agreement of experts on the items of the consultation questionnaire, and generally CV≤0.25. The Kendall coordination coefficient measures the consistency of experts' judgments on a specific object, and the value of the Kendall coordination coefficient ranges from 0 to 1, and the higher the score, the stronger the degree of coordination. The higher the degree of coordination, the smaller the coefficient of variation.

Table S2. Scale for assigning values to the basis of expert judgment

| Basis of judgment（Ca） | Expert self-assessment (extent) | | |
| --- | --- | --- | --- |
| Large | Medium | Small |
| Clinical experience | 0.3 | 0.2 | 0.1 |
| Theoretical analysis | 0.5 | 0.4 | 0.3 |
| Domestic and international related literature | 0.1 | 0.1 | 0.1 |
| Subjective judgment | 0.1 | 0.1 | 0.1 |

Table S3. Scale for assigning expert familiarity

| Degree of familiarity | Very familiar | Familiar | Average | Unfamiliar | Very unfamiliar |
| --- | --- | --- | --- | --- | --- |
| Expert self-assessment | 1.0 | 0.8 | 0.6 | 0.4 | 0.2 |

**Basic information**

Two rounds of expert consultation were conducted for this study. In the first round, 15 questionnaires were distributed and 15 were returned, with a 100% return rate; in the second round, 8 questionnaires were distributed and 8 were returned, with a 100% return rate. The average age of the experts was 42 years old, and the range of years of service was 10-39 years. The research areas of the invited experts were oncology nursing, surgical nursing, oncology, and psychology. See Table S4.

Table S4. Basic information on experts

| Number | Age(years) | Education level | Title | Field of work | Years of experience |
| --- | --- | --- | --- | --- | --- |
| 1 | 38 | Undergraduate | Associate chief nurse | Surgical nursing | 17 |
| 2 | 39 | Master's degree | Deputy chief physician | Study of tumors | 17 |
| 3 | 38 | Master's degree | Deputy chief physician | Study of tumors | 12 |
| 4 | 43 | Doctorate | Deputy chief physician | Breast surgery | 15 |
| 5 | 42 | Undergraduate | Deputy chief physician | Psychiatry | 18 |
| 6 | 42 | Master's degree | Deputy chief physician | Breast surgery | 14 |
| 7 | 40 | Master's degree | Deputy chief physician | Study of tumors | 14 |
| 8 | 41 | Master's degree | Deputy chief physician | Study of tumors | 16 |
| 9 | 42 | Undergraduate | Deputy chief physician | Breast surgery | 18 |
| 10 | 39 | Master's degree | Deputy chief physician | Study of tumors | 15 |
| 11 | 50 | Undergraduate | Chief nurse | Oncology nursing | 25 |
| 12 | 48 | Master's degree | Chief nurse | Oncology nursing | 22 |
| 13 | 37 | Master's degree | Associate chief nurse | Oncology nursing | 11 |
| 14 | 59 | Undergraduate | Chief physician | Study of tumors | 39 |
| 15 | 34 | Doctorate | Professor | Nursing psychology | 10 |

**Degree of authority of expert opinion**

In this study, the Cr values in the two rounds of consultation were 0.883 and 0.900 respectively, indicating that expert opinion had a positive guiding role in the development of the indicator framework.

Table S5. Expert authority coefficients for both rounds.

| Round | Basis of judgment | degree of familiarity (Cs) | level of authority  (Cr) |
| --- | --- | --- | --- |
| First round | 0.887 | 0.880 | 0.883 |
| Second round | 0.970 | 0.829 | 0.900 |

**Degree of expert coordination**

In this study, the fluctuation of the coefficient of variation in the first round was between 0.10 and 0.22, and the fluctuation of the coefficient of variation in the second round ranged from 0.10 to 0.24. The Kendall coordination coefficients of the two rounds of consultation were 0.352 and 0.462, respectively, with a statistically significant difference of P < 0.001, which indicated that the degree of coordination of the two rounds of expert consultation was better, as detailed in Table S6.

Table S6. Degree of expert coordination in the two rounds of expert advice

|  | First round | Second round |
| --- | --- | --- |
| Coordination factor (W) | 0.352 | 0.462 |
| degrees of freedom | 20 | 20 |
| Χ2 | 105.749 | 129.263 |
| *p* | < 0.001 | < 0.001 |

**Experts' suggestions and modifications**

According to their own professional orientation, the experts gave their opinions on the operability, applicability and pertinence of the content of the intervention program, which was revised according to the experts' opinions to form a revised draft of the intervention program. See Table S7.

Table S7. Expert advice and modifications.

| Correspondence comments | Contents of the modification |
| --- | --- |
| 1. Is it sufficient to have only microphone/telephone interventions after discharge? | Try to place the core intervention module in the hospital. |
| 2. Counselors should be added to the intervention implementers | Receive expert advice. Invite counselors to participate in the intervention. |
| 3. What is the effect of each intervention to be achieved and how will it be monitored? | After the intervention, assign homework and monitor completion. Before the next intervention, review the last content with the patient. |
| 4. Suggested additional time points for evaluation, possibly 6 months or 1 year post-intervention | Not modified given the time constraints of the subject. |
| 5. Health lectures can be conducted by inviting experts to give lectures and adding on-site interactive sessions. | Accepting experts' suggestions, the deputy chief physician of breast surgery was invited to explain the knowledge related to breast cancer disease, including the pathogenesis, clinical manifestations, auxiliary examination and treatment of breast cancer, etc., and questions and interaction were added on the spot, and small gifts were given to the research subjects who behaved positively. |
| 6. When providing counseling, it is recommended that a regular question-and-answer period be scheduled. | Receive expert advice and offer online counseling on Monday and Friday mornings. |
| 7. In the fourth intervention, patients and families who have recovered better should be invited to share their experiences. | Receive input from experts, invite better recovered patients and spouses to share, and provide peer support. |
| 8. Recommendation of books in the fourth intervention is not very realistic, taking into account the literacy level of the patient. | Receive expert advice and delete entries for recommended books. |
